# Supplementary material for: Recombinant tandem of pore-domains in a Weakly Inward rectifying K+ channel 2 (TWIK2) forms active lysosomal channels
Source: PubMed Central journal article supplement (PMC5428834; doi:10.1038/s41598-017-00640-8), 2017-04-05
Supplement: 41598_2017_640_MOESM1_ESM.pdf [file 41598_2017_640_MOESM1_ESM.pdf]

# Recombinant tandem of pore-domains in a Weakly Inward rectifying $K^+$ channel 2 (TWIK2) forms active lysosomal channels

Nicole Bobak, Sylvain Feliciangeli, Cheng-Chang Chen, Ismail Ben Soussia, Stefan Bittner,  
Sophie Pagnotta, Tobias Ruck, Martin Biel, Christian Wahl-Schott, Christian Grimm, Sven G.  
Meuth, Florian Lesage

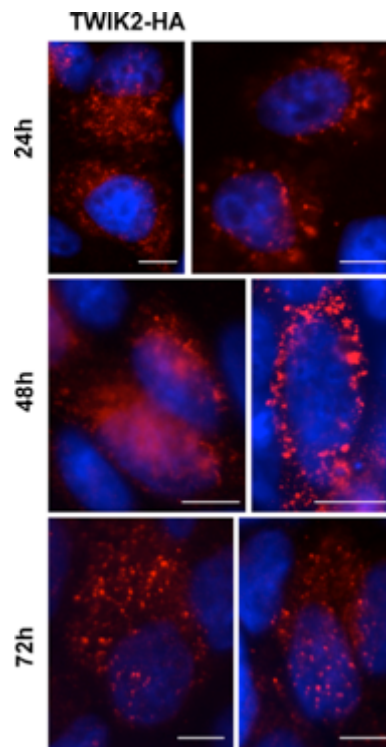

**SUPPLEMENTAL FIGURE 1.** *TWIK2* expression stability during 72h in MDCK cells. TWIK2-HA was transfected into MDCK cells and stained with HA-antibody 24h, 48h and 72h post transfection. Scale bar 10 $\mu$ m.

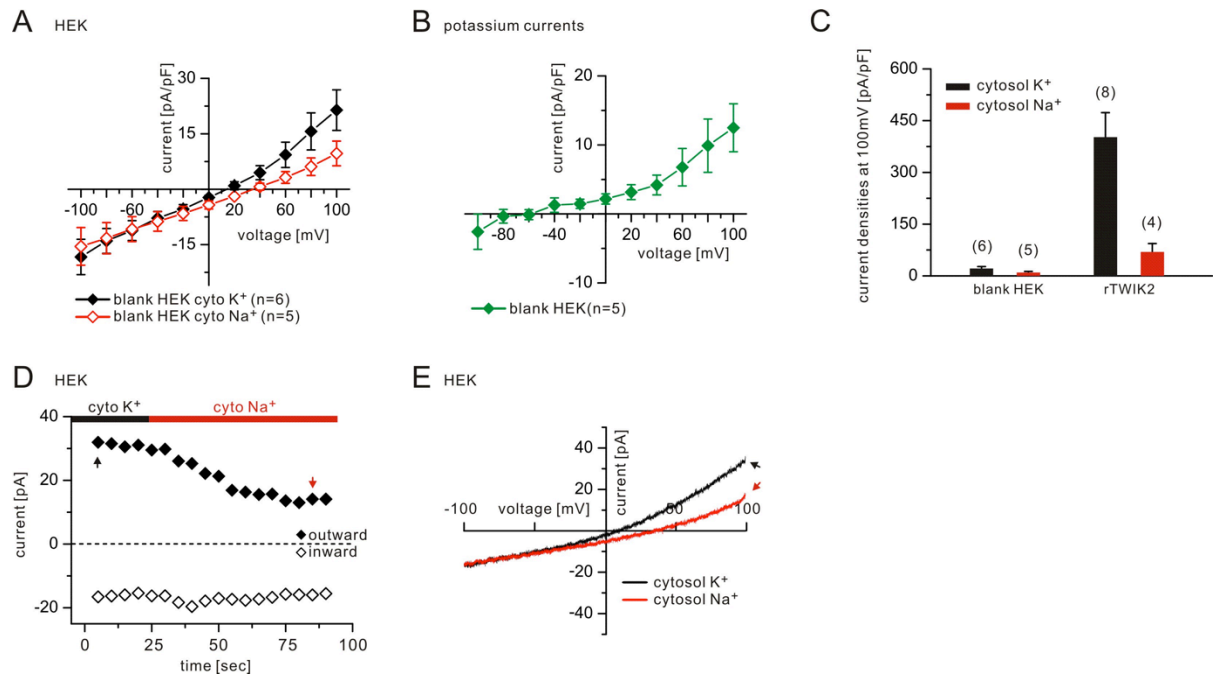

**SUPPLEMENTAL FIGURE 2. Endolysosomal K<sup>+</sup> currents from non-transfected HEK293 cells.** Cation currents were recorded in endolysosomes released from HEK293T cells. Representative currents were elicited by voltage step protocols from -100 to +100 mV (20 mV step) (**A and B**) or by voltage ramps from -100 to +100 mV (voltage holding at 0 mV) (**D and E**) with 145 mM K<sup>+</sup> and perfused with 145 mM Na<sup>+</sup> in the cytosol (bath) as indicated. Shown in **B** are potassium I-V curves ( $I_{\text{cyto high K}^+} - I_{\text{cyto high Na}^+}$ ) from blank HEK293T cells. (**C**) Column figures summarizing the current densities obtained at +100 mV. (**D**) Current amplitudes measured at -100 mV and +100 mV were used to plot the time course of activation. Data are represented as mean  $\pm$  s.e.m.

The profile of these small endogenous K<sup>+</sup> currents is in agreement with previous data that suggest that other K<sup>+</sup> permeable ion channels are present on endolysosomal membranes such as TMEM175, TRPMLs and BK channels (Cang et al, 2015; Cao et al, 2015; Chen et al, 2014a).

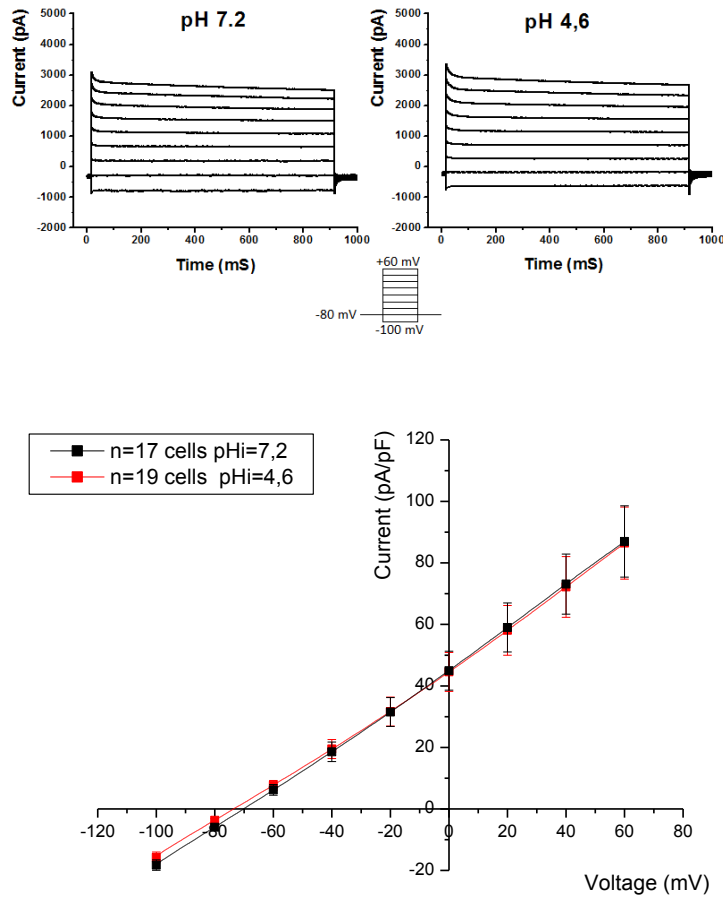

**SUPPLEMENTAL FIGURE 3.** Recordings of rat *TWIK2* *Y308A IL289/290AA* at the plasma membrane of transfected *HEK293T* cells.

|               |   |                     |            |            |            |            |                            |
|---------------|---|---------------------|------------|------------|------------|------------|----------------------------|
| H. Sapiens    | - | DLHGLTE <b>ELIL</b> | LPPPCPASFN | AEDDDRVDIL | GPQPESHQQL | SASSHTDYAS | IPR                        |
| M. musculus   | - | DLHGLTE <b>ELIL</b> | LPDPDPASLS | QEDDDQVAVL | DARTDLHQHL | SAASHADYAS | IPR                        |
| R. norvegicus | - | DLHGLTE <b>ELIL</b> | LPDPDPARLH | QEDDDQVDIL | DARTDLHQHL | SAASHANYAS | IPR                        |
| X. tropicalis | - |                     | TDIFY L    | PRLQDQDDQ  | EPILETTDYS | TRDLEPKRPL | ASESQPDYSS INR             |
| D. rerio      | - |                     | HLPSC      | EEDEEDKEPI | IEAGPEDDSP | EAEKASIKPL | DPSSQVS <del>YNS</del> INR |

**SUPPLEMENTAL FIGURE 4.** Conserved trafficking motifs in the C-terminus of *TWIK2*. *TWIK2*-C-terminal-sequences of *Homo sapiens*, *Mus musculus*, *Rattus norvegicus*, *Xenopus tropicalis* and *Danio rerio*.

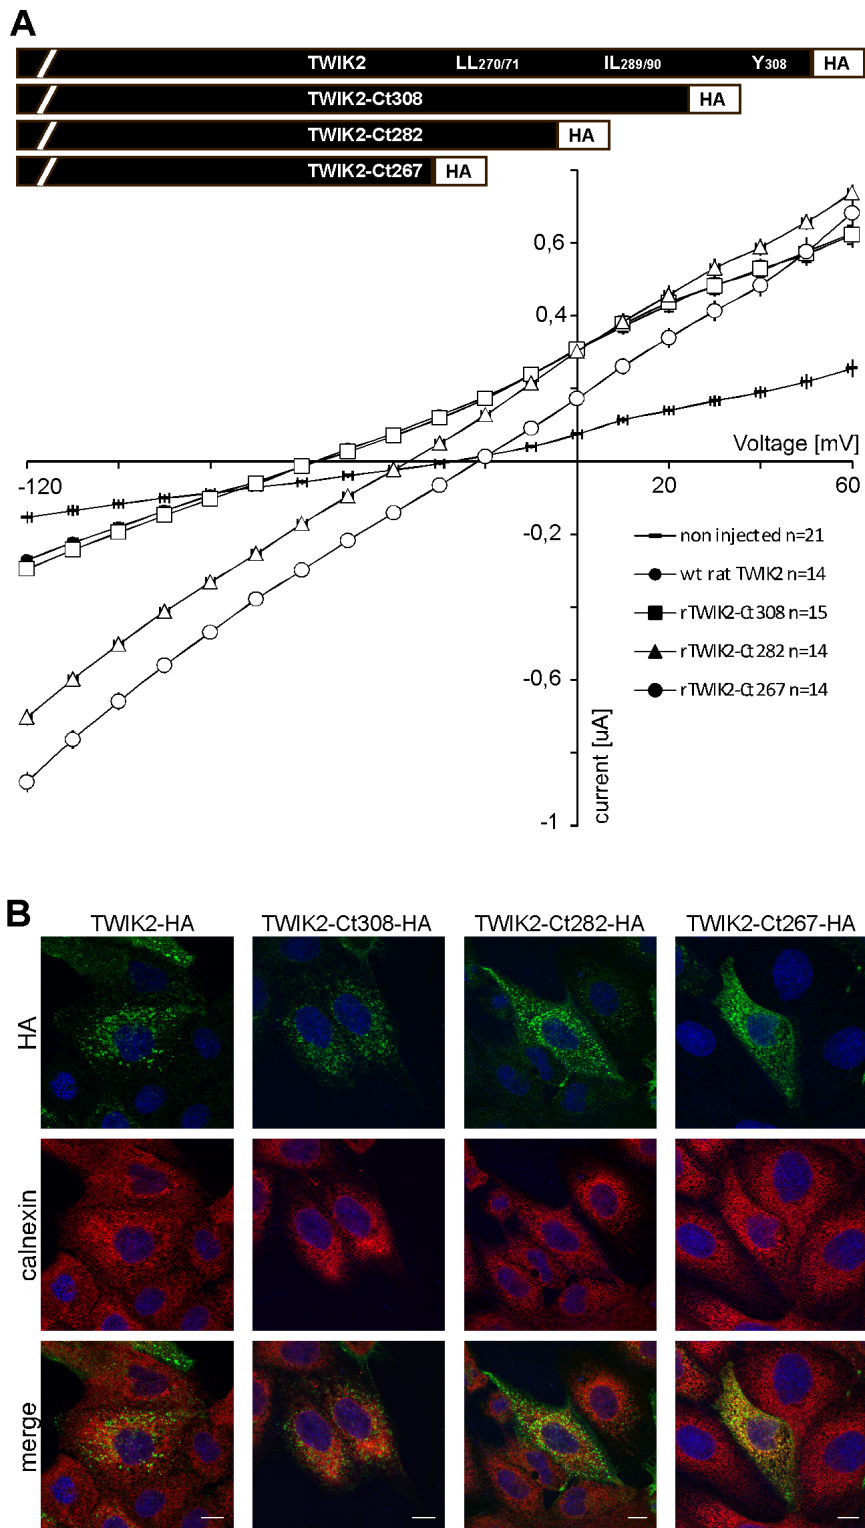

**SUPPLEMENTAL FIGURE 5. Effect of the truncation of the TWIK2 C-ter on cell trafficking.** (A) Truncated channels did not show significant changes in current amplitude when expressed and recorded in *Xenopus* oocytes and (B) showed intracellular localization when expressed and stained in MDCK cells. Scale bar: 10  $\mu$ M.

## **SUPPLEMENTAL VIDEO**

**LEGEND OF THE VIDEO:** Live HEK293 cells expressing TWIK2-GFP fusion protein (in green). Lysosomes are labelled with Lysotracker dye (in red).
